# Supplementary material
Source: PubMed Central journal article supplement (PMC9059794)
Supplement: NIHMS1795014-supplement-Supplemental_Figure_and_Legend.pdf [file NIHMS1795014-supplement-Supplemental_Figure_and_Legend.pdf]

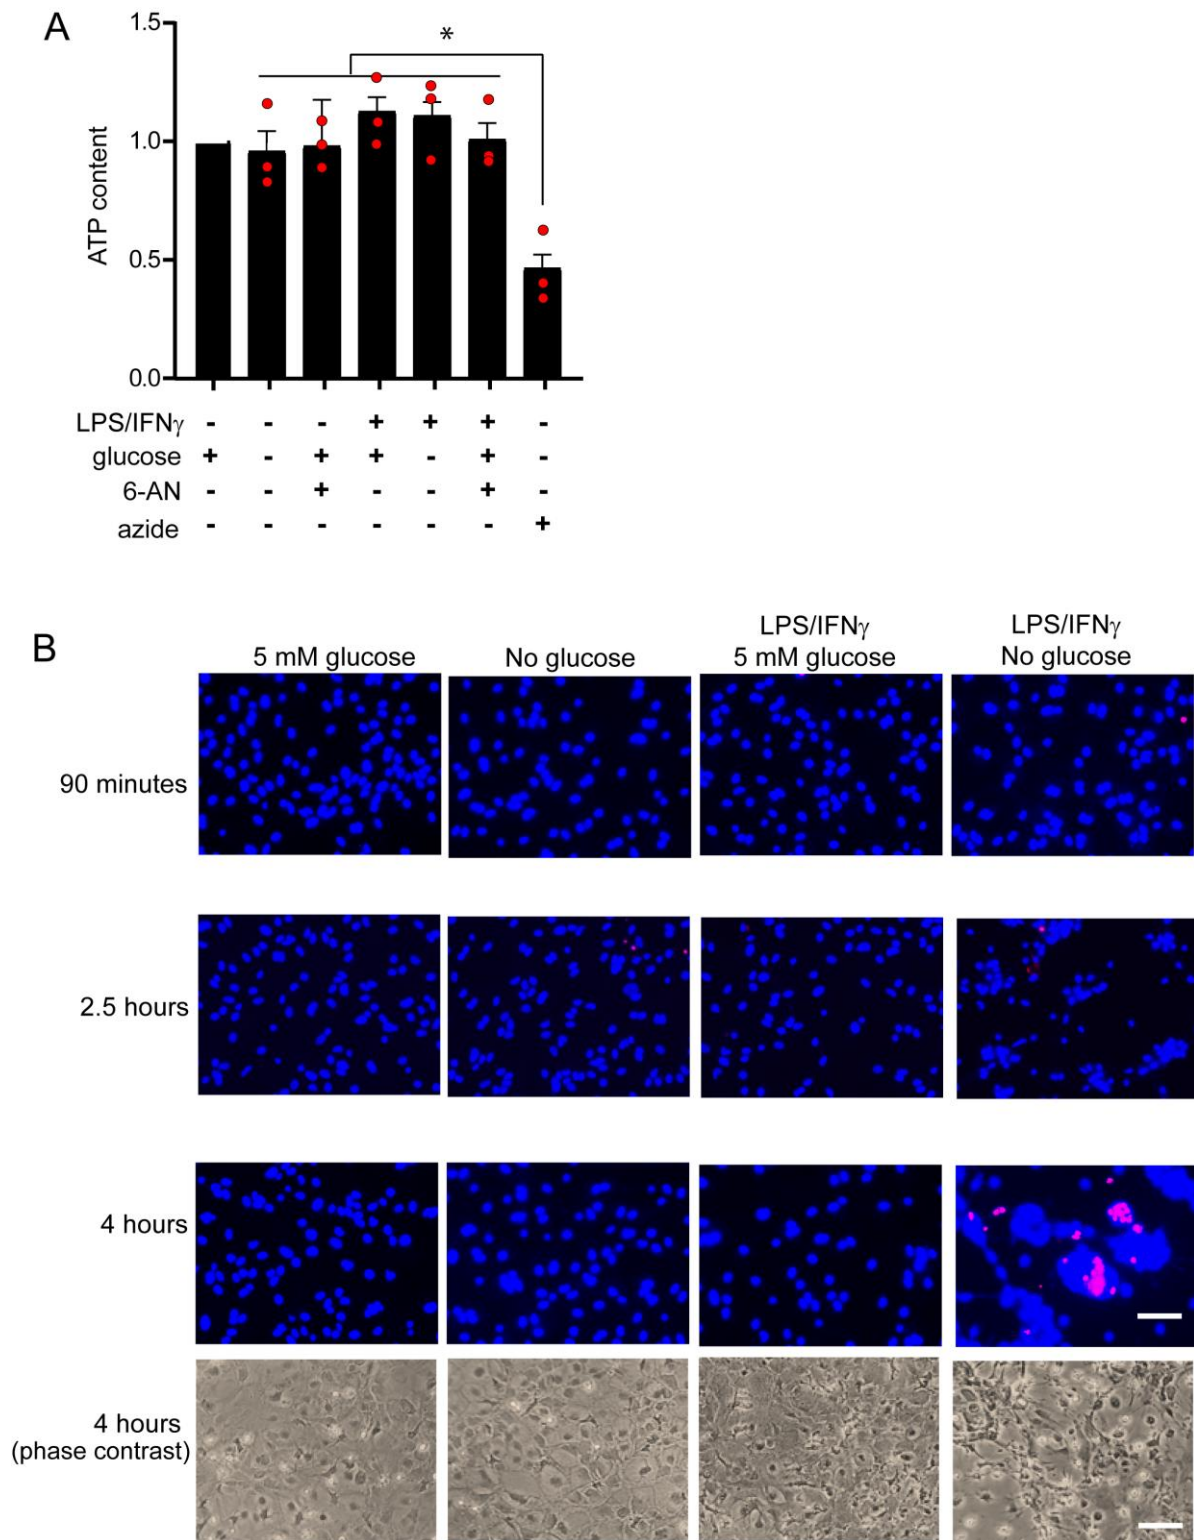

**Supplemental Figure 1. Cell ATP content and viability during glucose deprivation**  
**(A)** Mixed astrocyte/microglial cultures were incubated with LPS/IFN $\gamma$  or under control conditions for 18 hours and then incubated for 90 minutes in medium containing either 0 M

glucose, 5 mM glucose, 5 mM glucose plus 10  $\mu$ M 6-aminonicotinamide (6-AN), or, as a positive control, 0 glucose plus 5 mM sodium azide. Data from each experiment are normalized to the control condition (5 mM glucose, not stimulated by LPS/INF $\gamma$ ) and expressed as means  $\pm$  SEM. n = 3 experiments, each performed with independent culture preparations. \* p < 0.05 by ANOVA and Dunnett's test. [ANOVA F(5, 12) = 7.57, P = 0.002, r<sup>2</sup> = 0.7594; Browne-Forsythe F = .02172, P = 0.9997]

**(B)** Fluorescence and phase contrast images were obtained at the designated time intervals after 18 hours' incubation with or without LPS/INF $\gamma$  and subsequent incubation in glucose-free or control (5 mM glucose) medium for the designated time intervals. Dead cells are identified by propidium iodide (red), and cell nuclei by Hoescht (blue). Scale bar = 50  $\mu$ m. Cell death was less than 0.5% in any of the treatment conditions after 90 minutes and 2.5 hours, but increased to > 10% after 4 hours of glucose deprivation in the LPS/INF $\gamma$  - treated cultures. n = 4 independent culture preparations.
